# Supplementary material for: Anionic Polymerization of β-Butyrolactone Initiated with Sodium Phenoxides. The Effect of the Initiator Basicity/Nucleophilicity on the ROP Mechanism
Source: PubMed Central journal article supplement (PMC6680796; doi:10.3390/polym11071221), 2019-07-22
Supplement: polymers-11-01221-s001.pdf [file polymers-11-01221-s001.pdf]

## Supplementary Materials for

### Anionic polymerization of $\beta$ -butyrolactone initiated with sodium phenoxides. The effect of the initiator basicity/nucleophilicity on the ROP mechanism

Adrian Domiński<sup>1</sup>, Tomasz Konieczny<sup>1</sup>, Magdalena Zięba<sup>1</sup>, Magdalena Klim<sup>1</sup>, Piotr Kurcok<sup>1,2\*</sup>

<sup>1</sup> Centre of Polymer and Carbon Materials, Polish Academy of Sciences, 34, M. Curie-Skłodowskiej St., 41-819 Zabrze, Poland; [adrian.dominski@cmpw-pan.edu.pl](mailto:adrian.dominski@cmpw-pan.edu.pl) (A.D.); [tomasz.konieczny@cmpw-pan.edu.pl](mailto:tomasz.konieczny@cmpw-pan.edu.pl) (T.K.); [magdalena.zieba@cmpw-pan.edu.pl](mailto:magdalena.zieba@cmpw-pan.edu.pl) (M.Z.); [klim.magdalena@gmail.com](mailto:klim.magdalena@gmail.com) (M.K.); [piotr.kurcok@cmpw-pan.edu.pl](mailto:piotr.kurcok@cmpw-pan.edu.pl) (P.K.)

<sup>2</sup> Faculty of Mathematics and Natural Science, Jan Długosz University in Częstochowa, 13/15, Armii Krajowej Ave., 42-200 Częstochowa, Poland

\* Correspondence: [piotr.kurcok@cmpw-pan.edu.pl](mailto:piotr.kurcok@cmpw-pan.edu.pl)

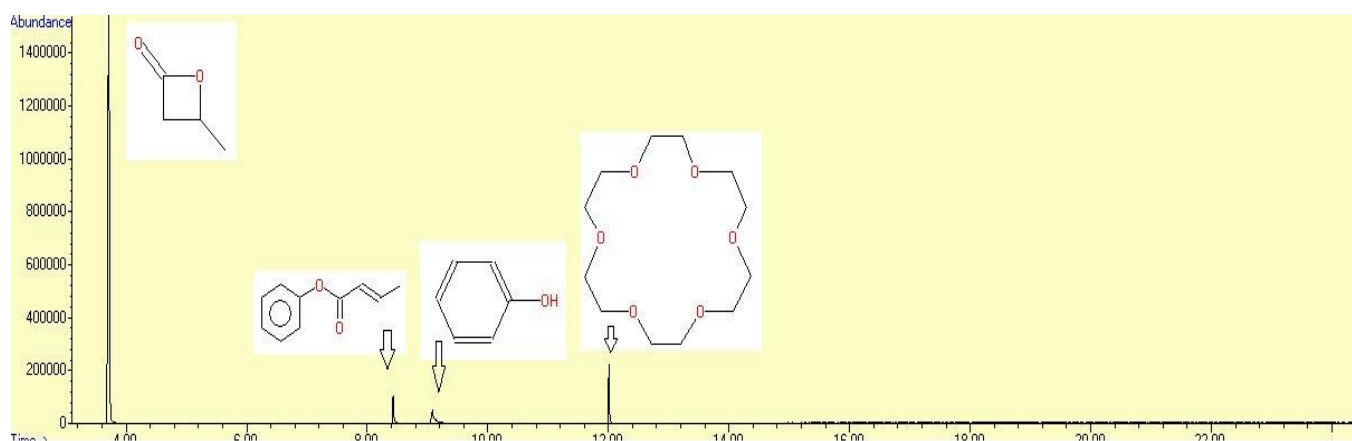

**Figure S1.** GC-MS spectrum of filtrate obtained *via* AROP of BL initiated with sodium phenoxide after polymer precipitation
